# Supplementary material
Source: publisher figshare collection journal article supplement (https://aacr.figshare.com/articles/dataset/_/22429815)
Supplement: Supplementary file 1 [file 39876150]

**Supplemental Table 2. Primer sequences for plasmid construction.**

| <b>Identifier</b>   | <b>Forward (5'-3')</b>                                          |
|---------------------|-----------------------------------------------------------------|
| Aldh1a1-Flag-pSIN-F | GCCCTTAGCTGTGGGAATACCGTGGTTGTCAAGCCAGCAGA<br>GCAAACCTCC         |
| Aldh1a1-Flag-pSIN-R | CCCACAGCTAAGGGCAGGGCCTATTTTCCATATAAACATCA<br>ACATTGGAAAATTCCAGG |
| K193Q-Flag-pSIN-F   | GCCCTTAGCTGTGGGAATACCGTGGTTGTCCAGCCAGCAGA<br>GCAAACCTCC         |
| K193R-Flag-pSIN-F   | GCCCTTAGCTGTGGGAATACCGTGGTTGTCAGGCCAGCAGA<br>GCAAACCTCC         |
| shAldh1a1-pLKO.1-F  | GATCTCGAGATCTTCCAAATGAACATGAGCTTTTTGAATTCT<br>CGACCTCGAG        |
| shAldh1a1-pLKO.1-R  | GAAGATCTCGAGATCTTCCAAATGAACATGAGCCGGTGTTT<br>CGTCCTTTCC         |
| shp65-4-pLKO.1-F    | GTTCTCGAGAACTCATCATAGTTGATGGTGTTTTTGAATTCT<br>CGACCTCGAG        |
| shp65-4-pLKO.1-R    | TGAGTTCTCGAGAACTCATCATAGTTGATGGTGCGGTGTTTC<br>GTCCTTTCC         |
| Shp65-5-pLKO.1-F    | CTACTCGAGTAGGCGAGTTATAGCCTCAGGTTTTTGAATTCT<br>CGACCTCGAG        |
| Shp65-5-pLKO.1-R    | CGCCTACTCGAGTAGGCGAGTTATAGCCTCAGGCGGTGTTTC<br>GTCCTTTCC         |
| shTAK1-1-pLKO.1-F   | ATTCTCGAGAATCTCATCAAAGGGTTTCCGTTTTTGAATTCT<br>CGACCTCGAG        |
| shTAK1-1-pLKO.1-R   | GAGATTCTCGAGAATCTCATCAAAGGGTTTCCGCGGTGTTTC<br>GTCCTTTCC         |
| shTAK1-5-pLKO.1-F   | AATCTCGAGATTCCATCACAAGACACACTGTTTTTGAATTCT<br>CGACCTCGAG        |
| shTAK1-5-pLKO.1-R   | TGGAATCTCGAGATTCCATCACAAGACACACTGCGGTGTTTC<br>GTCCTTTCC         |
| shGM-CSF-2-pLKO.1-F | ATGCTCGAGCATTCAACGTGACAGGCATGTTTTTGAATTCT<br>CGACCTCGAG         |
| shGM-CSF-2-pLKO.1-R | TGAATGCTCGAGCATTCAACGTGACAGGCATGTCGGTGTTTC<br>GTCCTTTCC         |
| shGM-CSF-4-pLKO.1-F | CTTCTCGAGAAGGAGAACTCGTTAGAGACGTTTTTGAATTCT<br>CGACCTCGAG        |
| shGM-CSF-4-pLKO.1-R | CTCCTTCTCGAGAAGGAGAACTCGTTAGAGACGCGGTGTTT<br>CGTCCTTTCC         |
